# Supplementary material
Source: Springer Nature journal article supplement (https://www.springermedizin.de/resource/supplementary/13058_2010_9495_MOESM1_ESM.pdf/9702272)
Supplement: MOESM1 [file 9702272]

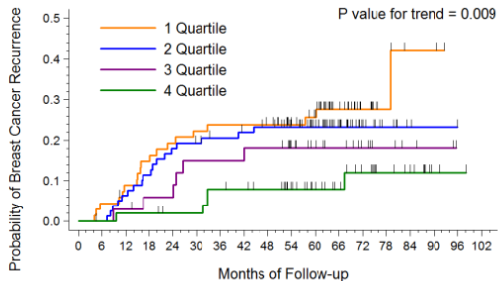

Number at risk

|    |    |    |    |    |    |    |    |   |   |
|----|----|----|----|----|----|----|----|---|---|
| 1Q | 68 | 61 | 54 | 51 | 50 | 38 | 12 | 2 | 0 |
| 2Q | 78 | 73 | 64 | 59 | 55 | 40 | 11 | 2 | 0 |
| 3Q | 35 | 33 | 31 | 28 | 27 | 17 | 9  | 3 | 0 |
| 4Q | 52 | 51 | 49 | 46 | 43 | 30 | 16 | 9 | 1 |

(a) Adiponectin

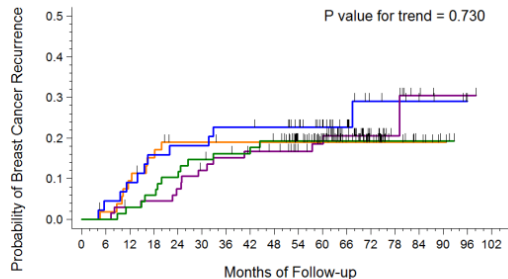

Number at risk

|    |    |    |    |    |    |    |    |   |   |
|----|----|----|----|----|----|----|----|---|---|
| 1Q | 53 | 48 | 40 | 39 | 39 | 26 | 15 | 5 | 0 |
| 2Q | 45 | 40 | 36 | 34 | 33 | 23 | 7  | 5 | 0 |
| 3Q | 67 | 64 | 61 | 55 | 52 | 42 | 14 | 3 | 1 |
| 4Q | 68 | 66 | 61 | 56 | 51 | 34 | 12 | 3 | 0 |

(b) Leptin

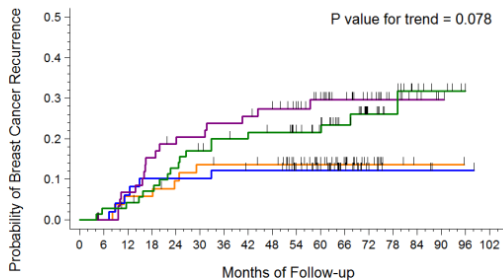

Number at risk

|    |    |    |    |    |    |    |    |   |   |
|----|----|----|----|----|----|----|----|---|---|
| 1Q | 52 | 49 | 46 | 43 | 42 | 26 | 9  | 1 | 0 |
| 2Q | 49 | 46 | 44 | 43 | 42 | 28 | 6  | 3 | 1 |
| 3Q | 60 | 55 | 47 | 44 | 40 | 29 | 15 | 5 | 0 |
| 4Q | 72 | 68 | 61 | 54 | 51 | 42 | 18 | 7 | 0 |

(c) HOMA-IR

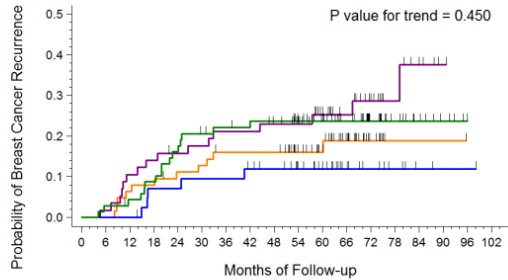

Number at risk

|    |    |    |    |    |    |    |    |   |   |
|----|----|----|----|----|----|----|----|---|---|
| 1Q | 63 | 59 | 55 | 51 | 51 | 30 | 7  | 1 | 0 |
| 2Q | 44 | 43 | 39 | 38 | 34 | 25 | 8  | 2 | 1 |
| 3Q | 57 | 51 | 47 | 44 | 41 | 28 | 13 | 5 | 0 |
| 4Q | 69 | 65 | 57 | 51 | 49 | 42 | 20 | 8 | 0 |

(d) Insulin
